# Supplementary material for: Synthesis and crystal structure of a series of incommensurately modulated composite oxohalide compounds
Source: Royal Society of Chemistry journal article supplement (doi:10.1039/c4dt02084g), 2014-01-01
Supplement: c4dt02084g7.pdf [file c4dt02084g7.pdf]

## Supporting material

### **Synthesis and crystal structure of a series of incommensurately modulated composite oxohalide compounds**

Iwan Zimmermann<sup>a</sup>, Alexis Corgnet<sup>a</sup>, Mats Johnsson<sup>a\*</sup>, Sven Lidin<sup>b</sup>

a) Department of Materials and Environmental Chemistry, Stockholm University, SE-106 91 Stockholm, Sweden

b) Department of Chemistry, Division of Polymer & Materials Chemistry, Lund University, Box 124, SE-221 00 Lund, Sweden

\* Corresponding author, Email: [mats.johnsson@mmk.su.se](mailto:mats.johnsson@mmk.su.se), tel: +46-8-162169, fax: +46-8-152187

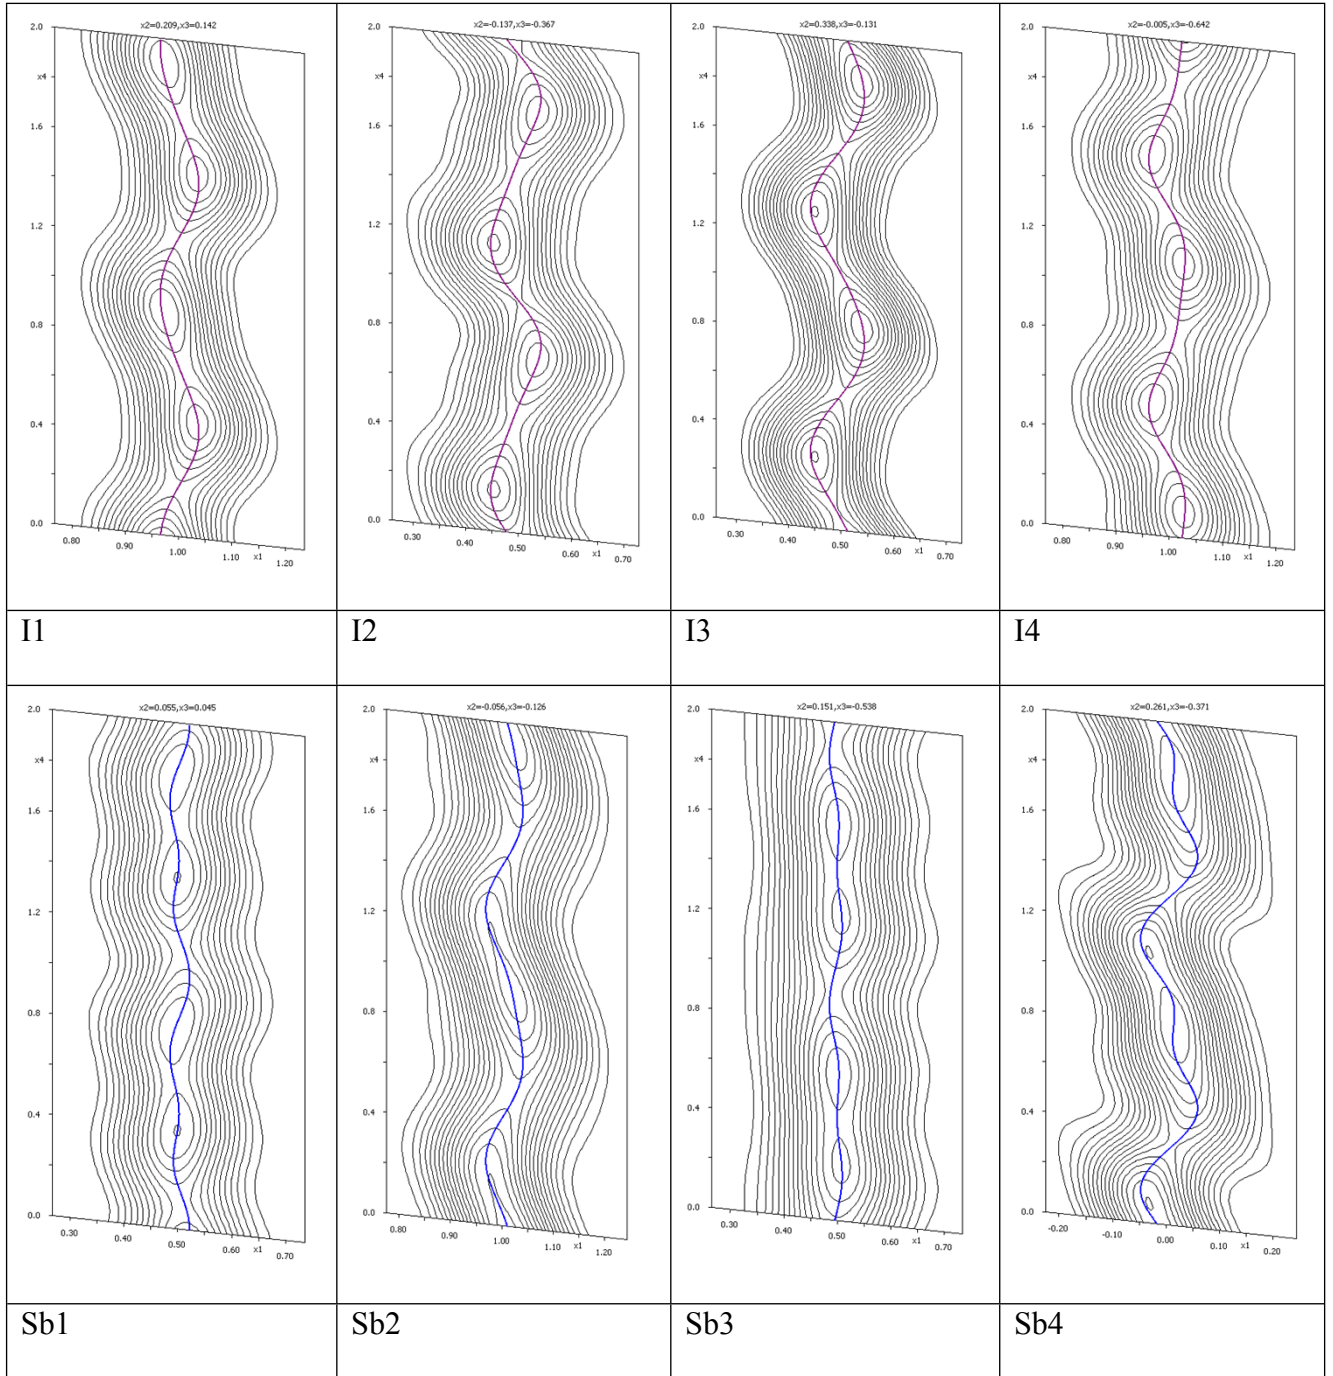

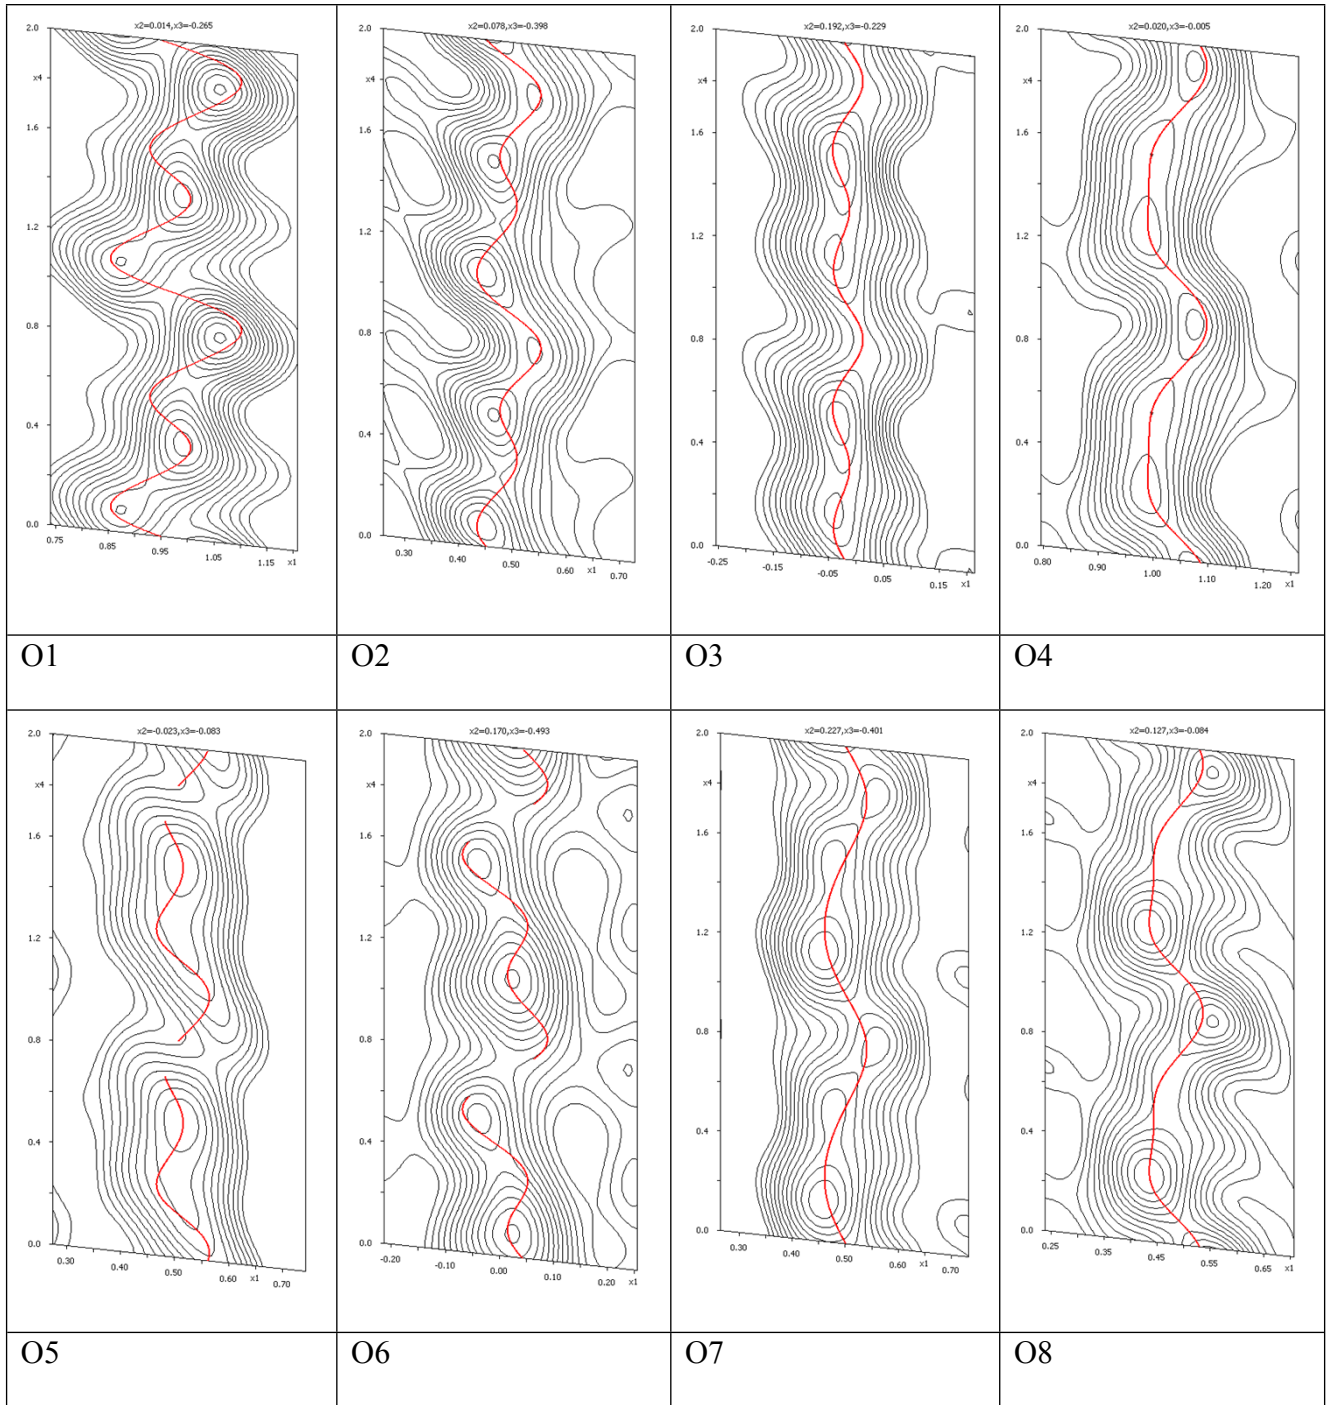

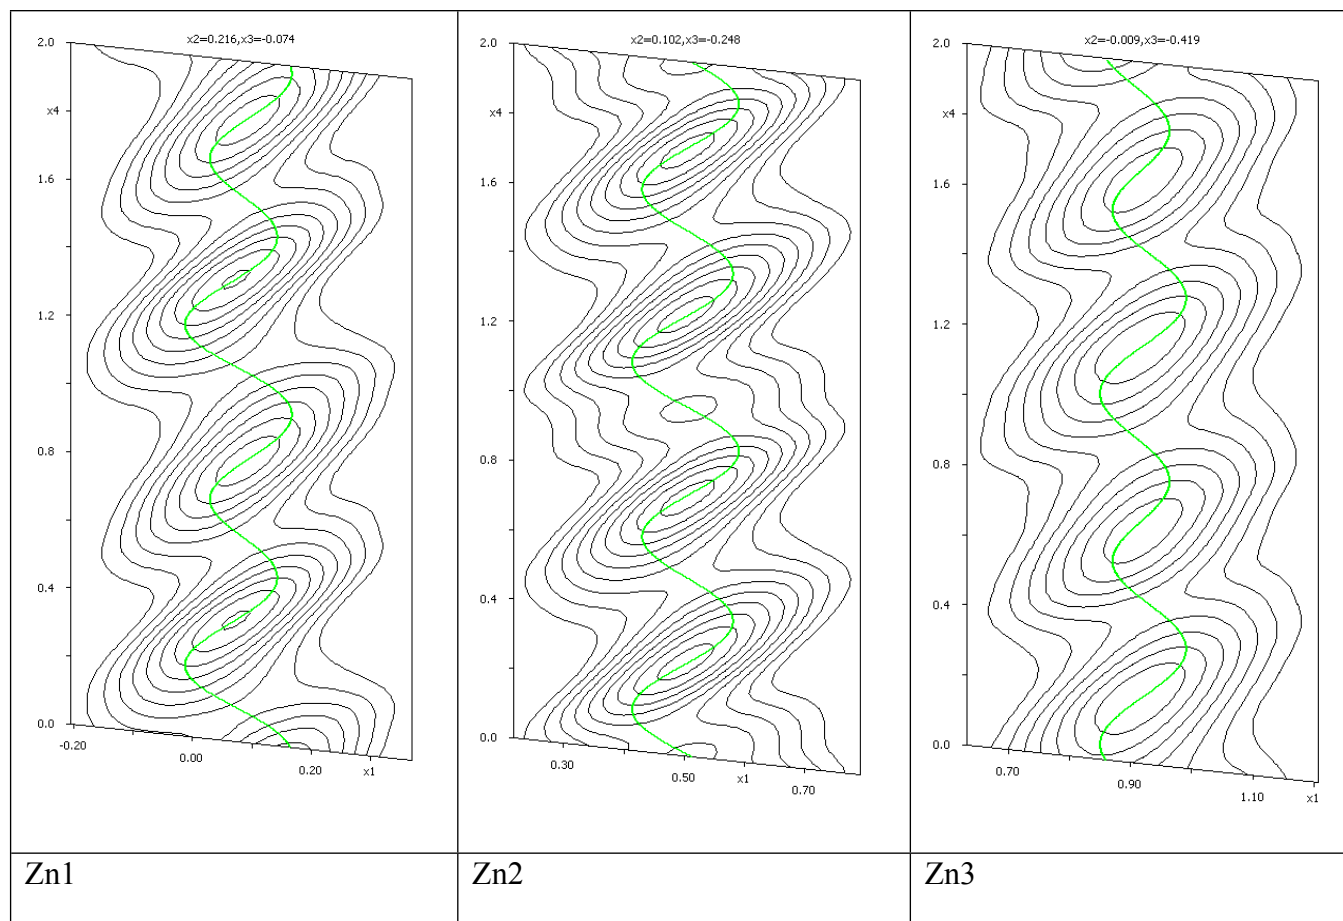

**Figure S-1** Selected sections of electron density maps of the various atomic species in the structure. The Zn atoms are located in a second composite unit cell. All sections show the same section of the structure, the position in  $x_1$  as a function of  $x_4$ . All maps are summed over  $0.5\text{\AA}$  in  $x_2$  and  $x_3$ . The levels of electron density are different in the different images.

| ZnCl           | O           | Cl          | Zn          | Sb          |
|----------------|-------------|-------------|-------------|-------------|
| Spectrum 1     | 63.4        | 9.05        | 12.6        | 14.9        |
| Spectrum 2     | 66.4        | 9.12        | 12.5        | 12          |
| Spectrum 3     | 58.7        | 11.7        | 14.3        | 15.4        |
| Spectrum 4     | 63.3        | 10.4        | 13.1        | 13.2        |
| Spectrum 5     | 66.4        | 8.75        | 12.8        | 12          |
| Spectrum 6     | 57.7        | 11.6        | 14.4        | 16.3        |
| Spectrum 7     | 58          | 11.4        | 14.4        | 16.3        |
|                |             |             |             |             |
| <b>Mean</b>    | <b>62.0</b> | <b>10.3</b> | <b>13.4</b> | <b>14.3</b> |
| Std. deviation | 3.83        | 1.31        | 0.87        | 1.87        |

**Table S-1** EDS data for  $[\text{Sb}_4\text{O}_{7+3\delta}\text{Cl}_4][\text{Zn}_3]_{1+\delta}$ ,  $\delta \approx 0.2$ 

| ZnBr           | O           | Zn          | Br          | Sb          |
|----------------|-------------|-------------|-------------|-------------|
| Spectrum 1     | 54.5        | 16.9        | 13.4        | 15.2        |
| Spectrum 2     | 53.8        | 14.8        | 13.7        | 17.7        |
| Spectrum 3     | 49.7        | 17.3        | 14.6        | 18.5        |
| Spectrum 4     | 56.3        | 14.8        | 12.9        | 16.0        |
| Spectrum 5     | 49.6        | 17.5        | 14.3        | 18.6        |
| Spectrum 6     | 47.6        | 18.1        | 17.2        | 17.2        |
| Spectrum 7     | 46.9        | 18.4        | 17.2        | 17.5        |
|                |             |             |             |             |
| <b>Mean</b>    | <b>51.2</b> | <b>16.8</b> | <b>14.8</b> | <b>17.3</b> |
| Std. deviation | 3.65        | 1.47        | 1.76        | 1.25        |

**Table S-2** EDS data for  $[\text{Sb}_4\text{O}_{7+3\delta}\text{Br}_4][\text{Zn}_3]_{1+\delta}$ ,  $\delta \approx 0.2$ 

| ZnI            | O           | Zn          | I           | Sb          |
|----------------|-------------|-------------|-------------|-------------|
| Spectrum 1     | 49.8        | 15          | 14.7        | 20.5        |
| Spectrum 2     | 52.3        | 17.4        | 12.8        | 17.5        |
| Spectrum 3     | 50          | 12.9        | 15.5        | 21.5        |
| Spectrum 4     | 54          | 12.7        | 13.6        | 19.7        |
| Spectrum 5     | 53.8        | 19.5        | 12.6        | 14.2        |
| Spectrum 6     | 52.7        | 19.2        | 13.4        | 14.7        |
| Spectrum 7     | 49.4        | 16.3        | 16.6        | 17.7        |
|                |             |             |             |             |
| <b>Mean</b>    | <b>51.7</b> | <b>16.2</b> | <b>14.2</b> | <b>18.0</b> |
| Std. deviation | 1.94        | 2.75        | 1.49        | 2.78        |

**Table S-3** EDS data for  $[\text{Sb}_4\text{O}_{7+3\delta}\text{I}_4][\text{Zn}_3]_{1+\delta}$ ,  $\delta \approx 0.2$

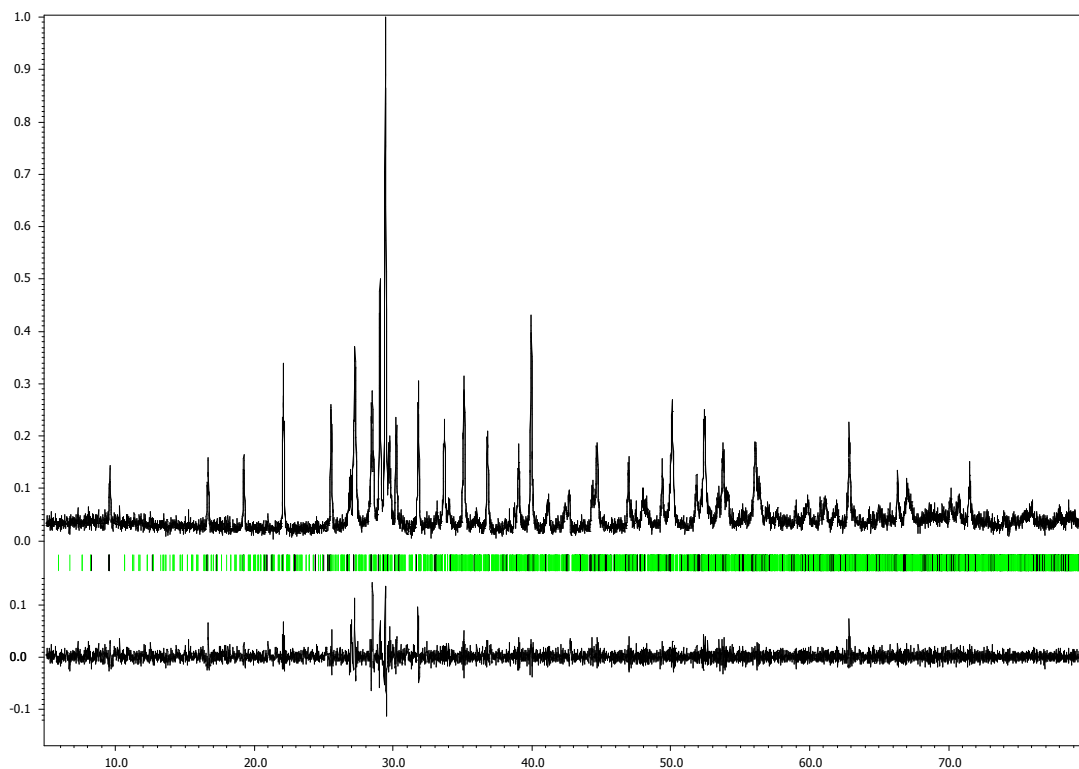

**Figure S-2** The powder diffractogram of  $[\text{Sb}_4\text{O}_{7+3\delta}\text{I}_4][\text{Zn}_3]_{1+\delta}$ ,  $\delta \approx 0.2$  was analyzed using the Le Bail fitting algorithm. GOF = 1.07, Rp = 15.63 %, Rwp = 20.74 %.
